# Supplementary material
Source: PubMed Central journal article supplement (PMC8673437)

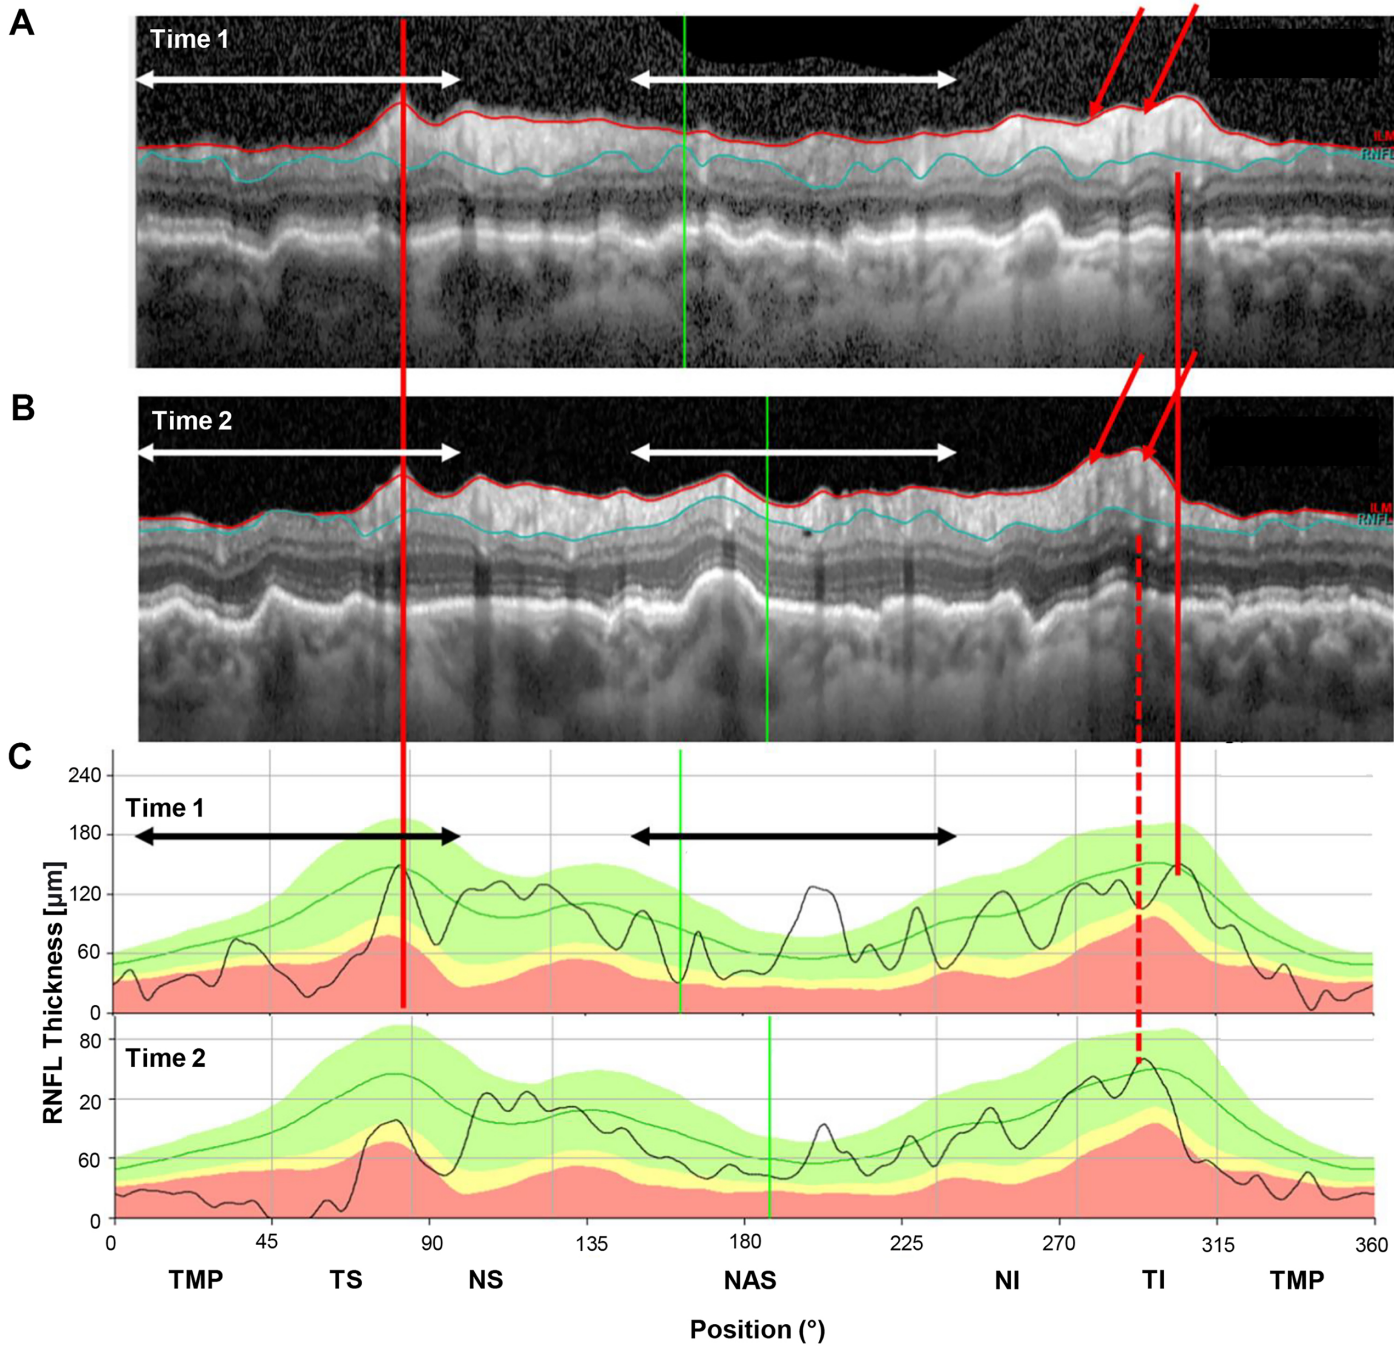

Supplement: NIHMS1688910-supplement-Appendix_Table_A1_final.pdf [file NIHMS1688910-supplement-Appendix_Table_A1_final.pdf]
